# Supplementary material for: SMAD3 contributes to ascending aortic dilatation independent of transforming growth factor-beta in bicuspid and unicuspid aortic valve disease
Source: PubMed Central journal article supplement (PMC9474869; doi:10.1038/s41598-022-19335-w), 2022-09-14
Supplement: 41598_2022_19335_MOESM1_ESM.pdf [file 41598_2022_19335_MOESM1_ESM.pdf]

**SMAD3 contributes to ascending aortic dilatation independent of transforming growth factor-beta in bicuspid and unicuspid aortic valve disease**

Brittany Balint, Jan Federspiel, Catherine Kollmann,  
Paul Tepping, Tanja Schwab,  
Hans-Joachim Schäfers

Supplemental Data

A.

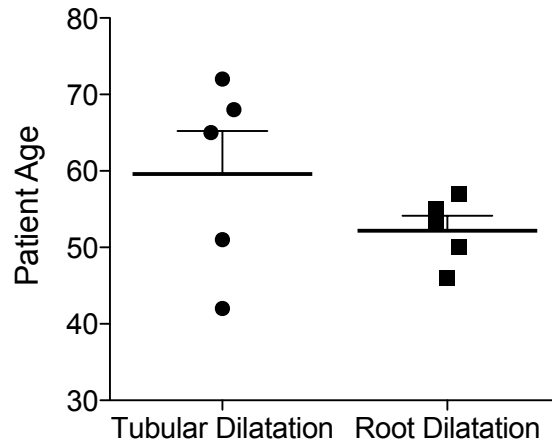

B.

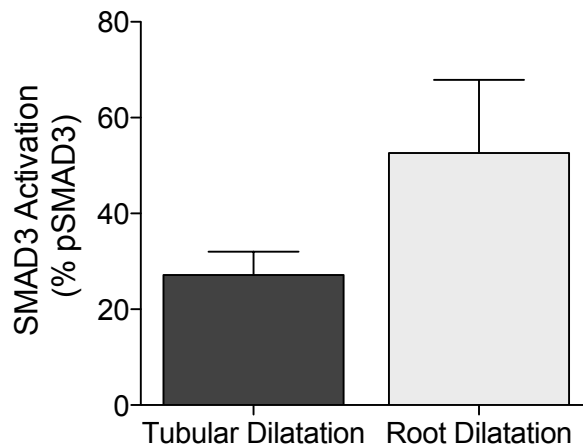

**Supplemental Figure 1. Sub-analysis of TAV aneurysms. A.** Graph depicting the age of TAV individuals with tubular ascending aortic dilatation (n=5) versus those with an aortic root dilatation (n=5;  $P=0.10$ ). **B.** Graph depicting the level of SMAD3 activation in the ascending aorta of TAV individuals with a tubular dilatation versus those with an aortic root dilatation ( $P=0.08$ ).

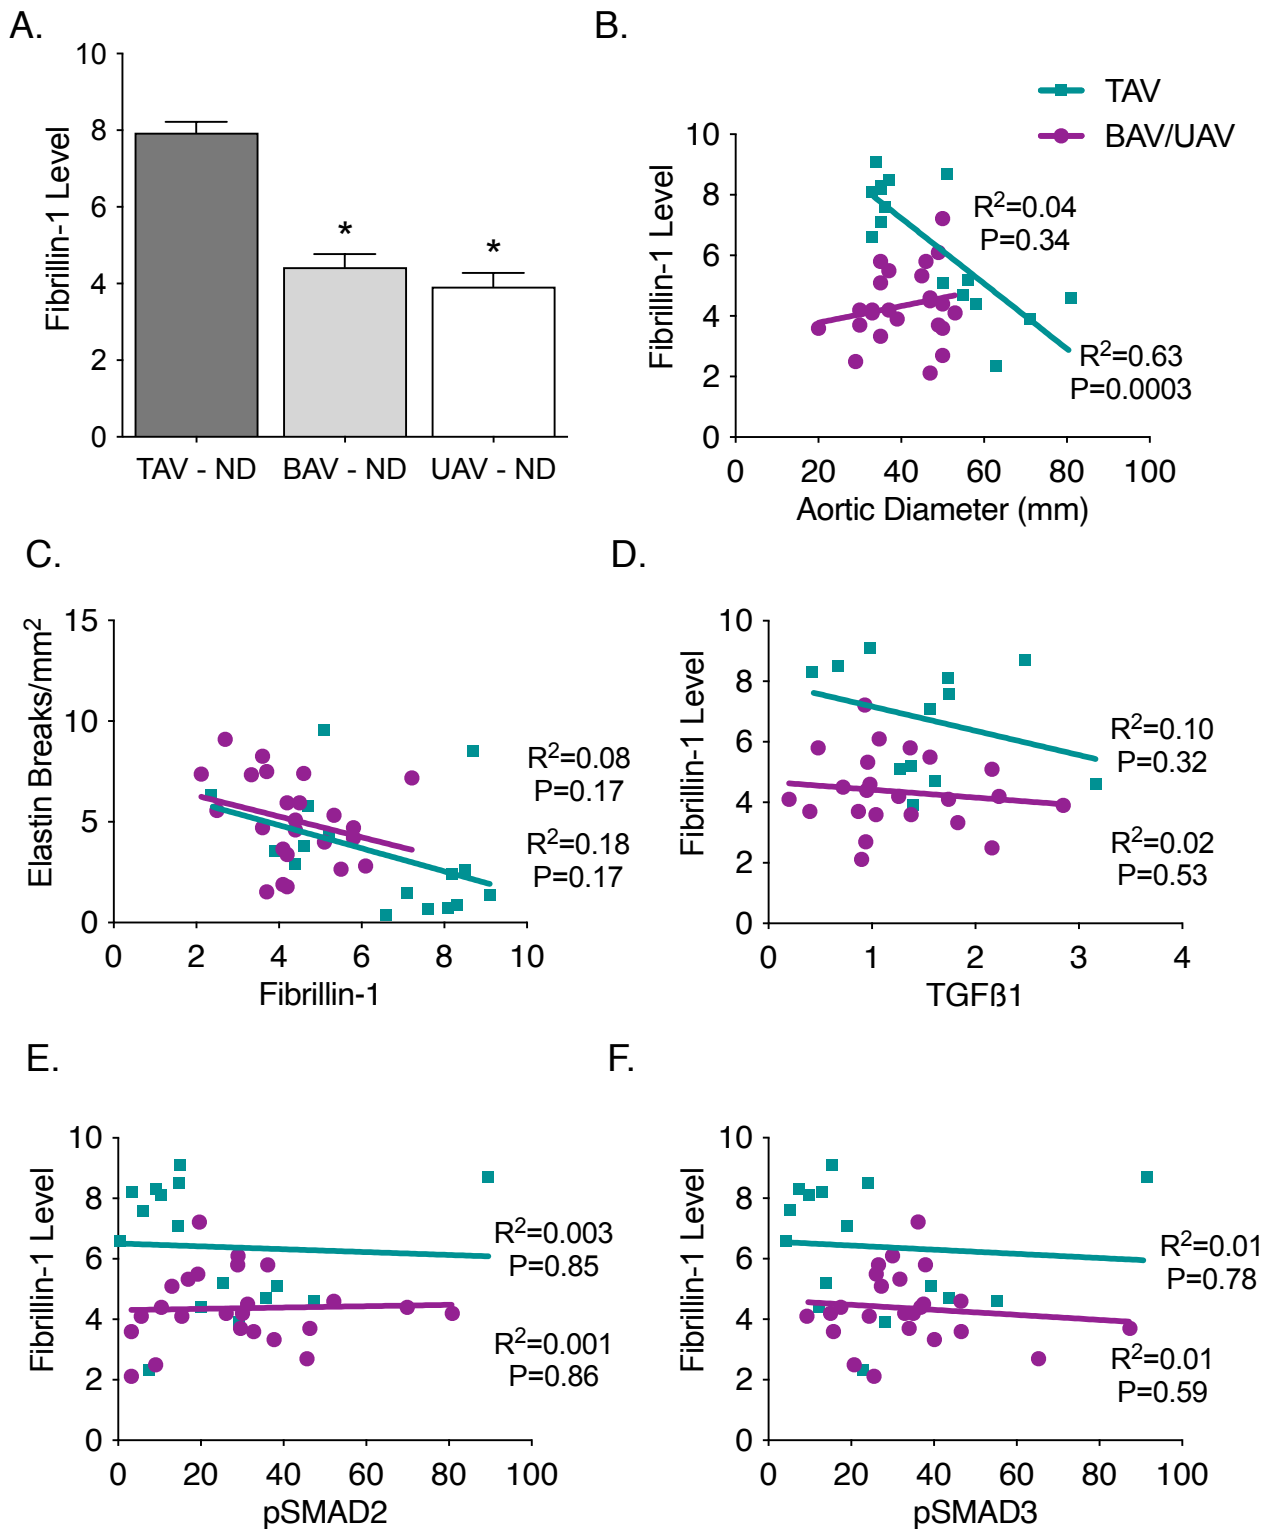

**Supplemental Figure 2. Fibrillin-1 concentration.** **A.** Graph depicting the Fibrillin-1 concentration in the aortic media from individuals with non-dilated (ND) aortas and either a tricuspid- (TAV), bicuspid- (BAV) or unicuspid- (UAV) aortic valve. **B-E.** Graphs depicting the relationships between aortic medial Fibrillin-1 levels and maximal aortic diameter (**B**), elastin breaks (**C**), TGFβ1 concentration (**D**), pSMAD2 (**E**), and pSMAD3 (**F**).  $*=P<0.05$ .
